# Supplementary material for: Topological ferrimagnetic behaviours of coordination polymers containing manganese(ii) chains with mixed azide and carboxylate bridges and alternating F/AF/AF′/AF′/AF interactions
Source: Royal Society of Chemistry journal article supplement (doi:10.1039/c4dt01151a), 2014-06-06
Supplement: c4dt01151a1.pdf [file c4dt01151a1.pdf]

## Electronic Supplementary Information

# Topological ferrimagnetic behaviours of coordination polymers containing manganese(II) chains with mixed azide and carboxylate bridges and alternating F/AF/AF'/AF'/AF interactions

Yan-Qin Wang, Hou-Ting Liu, Yan Qi, and En-Qing Gao\*

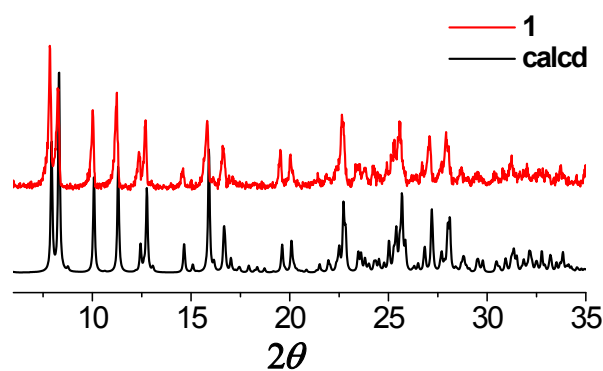

Fig. S1 The XRD patterns calculated from the single crystal data of **1** and observed for **1**.

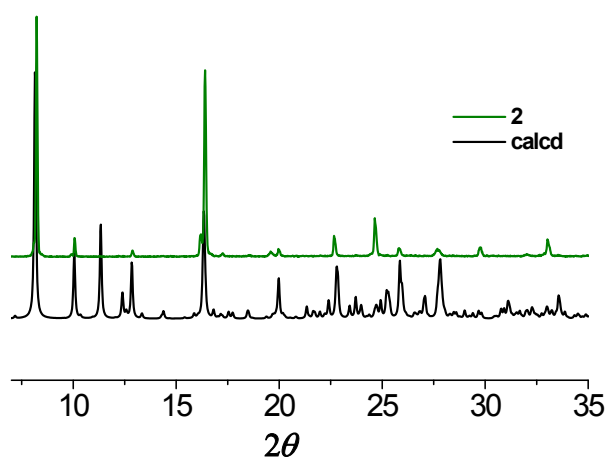

Fig. S2 The XRD patterns calculated from the single crystal data of **2** and observed for **2**.
